# Supplementary material
Source: PubMed Central journal article supplement (PMC6367154)
Supplement: rstb20180320supp1.pdf [file rstb20180320supp1.pdf]

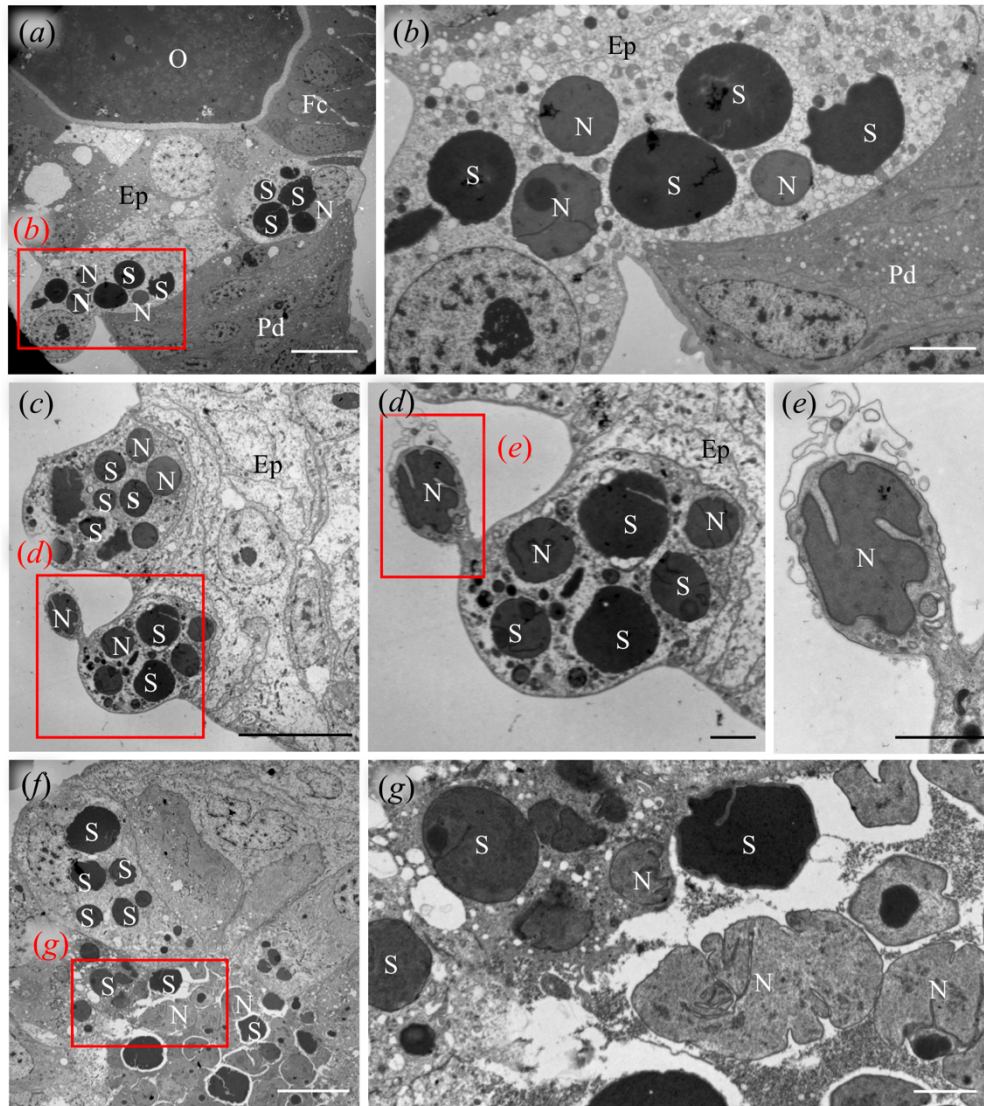

611

612 Figure S1. Localization of *Sulcia* and *Nasuia* in the epithelial plug in the ovary of  
 613 female *N. cincticeps*. (a, b) Distribution of *Sulcia* and *Nasuia* close to the epithelial  
 614 plug. Scale bars in a: 10  $\mu\text{m}$ ; b: 2  $\mu\text{m}$ . (c-e) Distribution of *Sulcia* and *Nasuia* within  
 615 the epithelial plug. Scale bars in c: 10  $\mu\text{m}$ ; d and e: 2  $\mu\text{m}$ . (f, g) Distribution of *Sulcia*  
 616 and *Nasuia* within the oocyte. Scale bars in f: 10  $\mu\text{m}$ ; g: 2  $\mu\text{m}$ . Panels b, d, e and g are  
 617 enlargements of boxed areas in panels a, c, d and f, respectively. Ep, epithelial plug;  
 618 Fc, follicular cell; N, *Nasuia*; O, oocyte; Pd, pedicel; S, *Sulcia*. All micrographs are  
 619 representative of at least three repetitions.

620

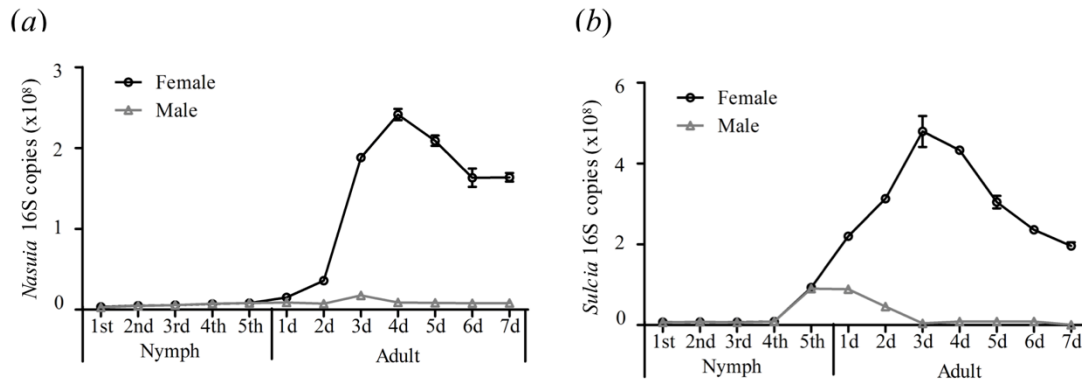

621

622 Figure S2. Copy number dynamics of 16S rRNA from (a) *Nasuia* and (b) *Sulcia* in the  
 623 nymph and 1-7 days after emergence of *N. cincticeps* as detected by RT-qPCR assay.

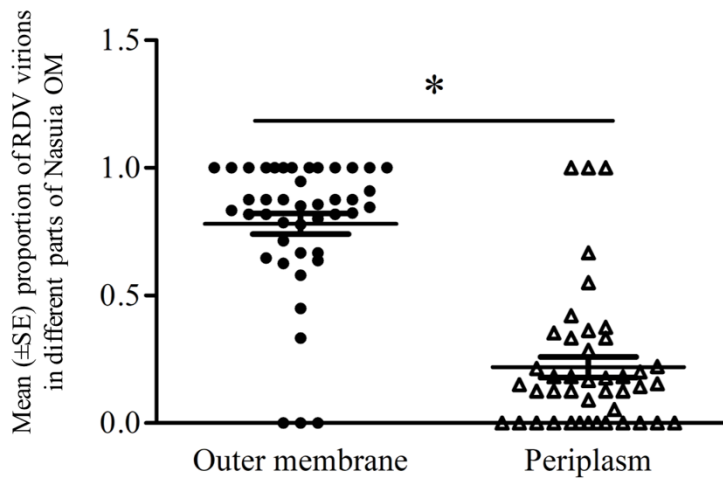

624

625 Figure S3. Mean ( $\pm$ SE) proportion of RDV virions within the periplasmic spaces or  
 626 on the outer membranes of *Nasuia*. The distribution of RDV virions was based on 43  
 627 *Nasuia* samples. Data from three independent experiments were tested with an  
 628 independent-sample *t*-test at 0.05 level.

629

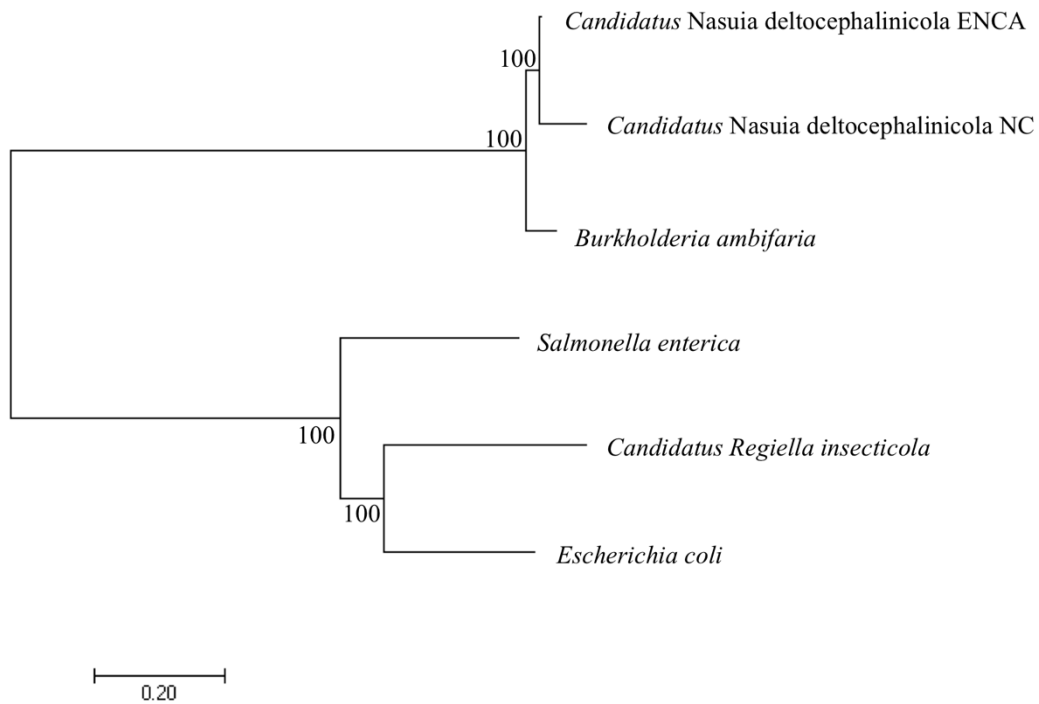

631

632 Figure S4. Phylogenetic relationships of porin orthologs of *Nasuia* from *N. cincticeps*  
633 with counterparts. The available sequences were aligned using Clustal W, and  
634 phylogenetic trees were reconstructed by neighbor-joining analysis with *P*-distance  
635 using MEGA 5.1. Reliability of the phylogenetic trees was estimated by calculating  
636 bootstrap confidence limits based on 1000 replicates.

637

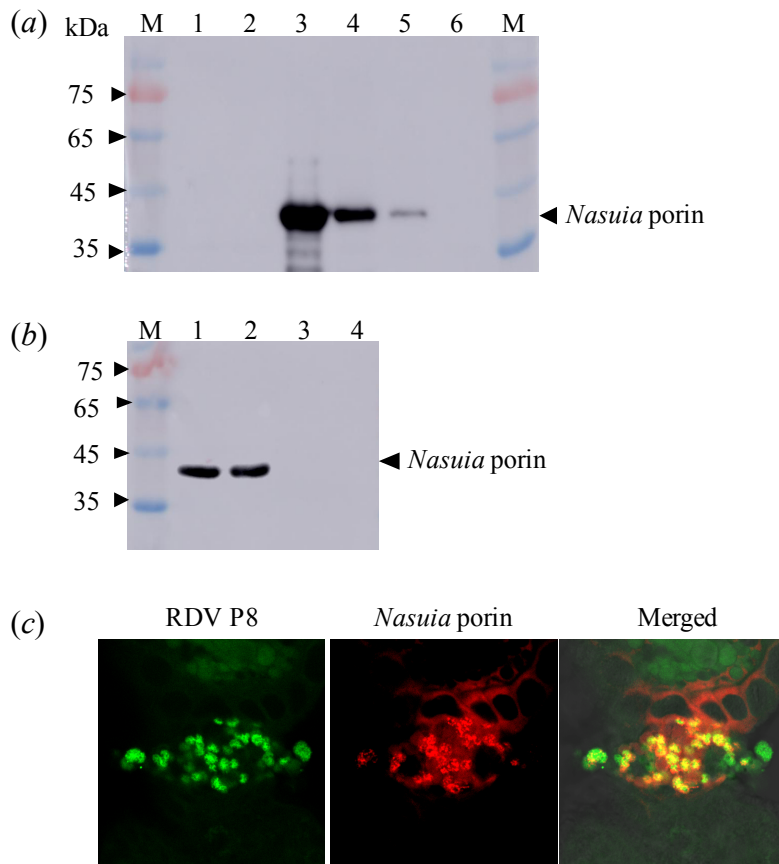

639

640 Figure S5. Levels of *Nasuia* porin extracted from different tissues of *N. cincticeps*. (a)

641 Specificity of antibody against *Nasuia* porin. Samples were separated by SDS-PAGE

642 and detected with porin-specific antibody. Lanes: M, protein marker; 1 and 2, non-

643 inducible expression of porin in *E. coli*; 3, inducible expression of porin in *E. coli*;

644 purified porin (100 mM washing buffer); 5, purified porin (150 mM washing buffer);

645 6, purified porin (200 mM washing buffer). (b) Porin proteins extracted from female

646 adult bacteriomes (lane 1), abdomen (segments 1, 2) (lane 2), abdomen (segments 3–

647 5) (lane 3), and thorax and head (lane 4). (c) Immunofluorescence detection of the

648 colocalization of RDV and *Nasuia*. Ovaries of viruliferous *N. cincticeps* were

649 immunolabeled with RDV-FITC (green) for RDV and Porin-rhodamine (red) for

650 *Nasuia*. Ep, epithelial plug; Fc, follicular cell; O, oocyte; Pd, pedicel. All images are

651 representative of at least three replications.

652 Table S1 Primers used in this study

| Oligonucleotide        | Assay               | Sequence (5'-3')                                                   |
|------------------------|---------------------|--------------------------------------------------------------------|
| EF1_F                  | qPCR                | CAGTGAGAGCCGTTTTGAG                                                |
| EF1_R                  | qPCR                | AGGGCATCTTGTCAGAGGGC                                               |
| <i>Nasuia</i> _F       | qPCR                | GGGAAAACCTCGCGTTATA                                                |
| <i>Nasuia</i> _R       | qPCR                | CCACTGCTGCCTCTCGTAAG                                               |
| <i>Sulcia</i> _F       | qPCR                | GGGGACTCTAATAAGACTGC                                               |
| <i>Sulcia</i> _R       | qPCR                | CTGAGATCGGCTTTCTGGAT                                               |
| RDV-P8_F               | qPCR                | GCTTCGAGCTTGTGGACAGT                                               |
| RDV_P8_R               | qPCR                | CGCACCAGCAGATTCCTTAT                                               |
| RDV_P8_F               | Y2H                 | <u>GGCCATGGAGGCC</u> ATGTCACGCCAGATGTGGTTAG                        |
| RDV_P8_R               | Y2H                 | <u>GGCCTCCATGGCCAT</u> CTAATTTGGTCTATAGTATCTTCCA                   |
| RDV_P2_F               | Y2H                 | <u>AGTGAATTCACATGGCTTATCCTAACGACGTC</u>                            |
| RDV_P2_R               | Y2H                 | <u>ATGGATCCCGTACTA</u> AAAAACATCAGCGTGCTCTACG                      |
| <i>Nasuia</i> _porin_F | Y2H                 | <u>GGCCATGGAGGCC</u> ATGTCAAATTC AATTTATTT<br>TTTTTTTATAG          |
| <i>Nasuia</i> _porin_R | Y2H                 | <u>GGCCTCCATGGCCTT</u> AATCTAATAATTTTAAAAATTT<br>TTTTATAATAAG      |
| <i>Sulcia</i> _OMP_F   | Y2H                 | <u>AGTGAATTCACATGT</u> ATGGAGATAATCAAAAAAT<br>TATTTT               |
| <i>Sulcia</i> _OMP_R   | Y2H                 | <u>ATGGATCCCGTACT</u> AATATGCAATATCACATCCTAA<br>AAAT               |
| <i>Nasuia</i> _porin_F | Antibody generation | <u>CGAGGGATCCGA</u> ATGTCAAATTC AATTTATTT<br>TTTTTTTATAG           |
| <i>Nasuia</i> _porin_R | Antibody generation | <u>TTGAATTCGGAT</u> TTAATCTAATAATTTTAAAAATTT<br>TTTATAATAAG        |
| RDV_P8_F               | Pull down           | <u>GGGGACAAGTTTGTACAAAAAAGCAGGCTTCATGT</u><br>CACGCCAGATGTGGTTAG   |
| RDV_P8_R               | Pull down           | <u>GGGGACCACTTTGTACAAGAAAGCTGGGTCCTAAT</u><br>TTGGTCTATAGTATCTTCCA |
| <i>Nasuia</i> _porin_F | Pull down           | <u>CGTGGATCCCCGATGTCAAATTC AATTTATTT</u><br>TTTTTTTATAG            |
| <i>Nasuia</i> _porin_R | Pull down           | <u>GATGAATTCGGT</u> TTAATCTAATAATTTTAAAAATTT<br>TTTATAATAAG        |
